# Supplementary material
Source: Preprints.org preprint supplement (doi:10.20944/preprints202105.0379.v1)
Supplement: Supplementary file 1 [file supplementary]

Table S1. Air temperature and rainfall in May, June and July of 2017, 2018 and 2019 in two experimental locations

| Month | Cerekwica | | Radzików | |
| --- | --- | --- | --- | --- |
| Rainfall (mm) | Temp. oC | Rainfall (mm) | Temp. oC |
| 2017 | | | | |
| May | 52.8 | 13.6 | 57.0 | 14.6 |
| June | 53.4 | 17.4 | 126.6 | 18.4 |
| July | 168.0 | 17.8 | 70.0 | 18.9 |
| 2018 | | | | |
| May | 16.6 | 17.9 | 73.2 | 17.9 |
| June | 22.8 | 19.4 | 25.2 | 19.3 |
| July | 81.3 | 20.8 | 80.0 | 22.1 |
| 2019 | | | | |
| May | 95.0 | 16.0 | 9.2 | 16.7 |
| June | 3.6 | 23.0 | 40.8 | 22.8 |
| July | 43.0 | 19.0 | 53.2 | 19.1 |
